# Supplementary material for: Characterization of Mycobacterium chelonae-Like Strains by Comparative Genomics
Source: Front Microbiol. 2017 May 8;8:789. doi: 10.3389/fmicb.2017.00789 (PMC5420552; doi:10.3389/fmicb.2017.00789)
Supplement: Supplementary file 6 [file Table6.XLSX]

## Sheet: Jspecies (2,3,5 e 6)
Supplementary Table 6 - ANIb and ANIm values obtained with the 26 isolates and the M. chelonae-M. abscessus type strains
ANIb	96-1705	96-1717	D16Q24	96-1720	96-1724	96-1728	D16R2	D16R3	D16R7	D16R9	D16R10	D16R14	D16R19	D16R20	96-892	D16Q13	D16Q16	D16Q14	D16Q20	D16R24	D17A2	D16Q15	D16R12	D16R18	D16Q19	D16R27	ATCC 19977T	CCUG 48898T	CCUG 50184T	ATCC 35752T	DSM 45524T	ATCC 700505T	ATCC 13758T	CCUG 66554T
96-1705	---	97.62	97.59	97.4	97.53	97.65	97.6	97.61	97.61	97.57	97.58	97.6	97.61	97.61	87.15	87.16	87.24	86.92	86.92	86.84	86.84	86.7	87.07	87.15	84.46	84.46	83.15	83.17	83.16	95.25	84.36	83.38	87.08	84.8
96-1717	97.62	---	99.08	98.54	99.2	99.25	99.12	99.09	99.11	99.23	99.25	99.09	99.12	99.19	87.11	87.1	87.19	86.91	86.98	86.91	86.91	86.62	87.13	87.2	84.51	84.5	83.11	83.15	83.12	95.35	84.29	83.39	87.05	84.73
D16Q24	97.49	98.96	---	98.12	99.07	99.1	99.93	99.83	99.84	99.02	99.1	99.94	99.91	99.98	87.05	87.05	87.13	86.85	86.88	86.73	86.73	86.61	87.04	87.08	84.4	84.4	83.34	83.1	83.09	95.25	84.12	83.59	86.99	84.7
96-1720	97.62	98.78	98.49	---	98.74	98.8	98.49	98.56	98.57	98.74	98.75	98.55	98.74	98.66	87.15	87.14	87.21	86.99	87.05	86.94	86.94	86.99	87.16	87.15	84.54	84.55	83.27	83.28	83.23	95.26	84.43	83.54	87.07	84.86
96-1724	97.49	99.06	98.98	98.42	---	99.14	99.06	99.01	99.03	99.87	99.92	99.01	99.11	99.17	86.98	86.97	87.07	86.83	86.89	86.8	86.8	86.63	87.05	87.1	84.41	84.42	83.05	83.11	83.04	95.25	84.23	83.23	87	84.64
96-1728	97.61	99.19	99.16	98.52	99.23	---	99.17	99.16	99.17	99.22	99.24	99.16	99.19	99.18	87.1	87.1	87.2	86.94	86.91	86.9	86.9	86.67	87.08	87.13	84.46	84.46	83.08	83.15	83.16	95.37	84.38	83.36	87	84.67
D16R2	97.57	99.01	99.98	98.19	99.12	99.12	---	99.96	99.98	99.11	99.12	99.97	99.98	99.96	87.08	87.07	87.17	86.88	86.88	86.74	86.74	86.61	87.07	87.1	84.37	84.38	83.34	83.15	83.14	95.24	84.19	83.59	87.01	84.71
D16R3	97.59	98.97	99.87	98.24	99.13	99.1	99.94	---	100	99.1	99.17	99.96	99.93	99.85	87.15	87.15	87.22	86.93	86.97	86.86	86.85	86.69	87.13	87.14	84.48	84.48	83.43	83.19	83.21	95.24	84.37	83.65	87.06	84.77
D16R7	97.56	98.99	99.87	98.22	99.08	99.12	99.95	99.99	---	99.07	99.13	99.98	99.94	99.82	87.07	87.06	87.14	86.85	86.88	86.74	86.74	86.63	87.07	87.06	84.37	84.37	83.31	83.09	83.1	95.26	84.27	83.54	87.02	84.67
D16R9	97.46	99.12	99.04	98.41	99.92	99.13	99.12	99.07	99.08	---	99.95	99.06	99.17	99.18	87.03	87.01	87.1	86.9	86.94	86.91	86.89	86.65	87.06	87.09	84.44	84.43	83.07	83.13	83.05	95.23	84.24	83.24	87.02	84.69
D16R10	97.47	99.11	99.1	98.37	99.9	99.14	99.15	99.12	99.13	99.95	---	99.11	99.2	99.21	86.98	86.96	87.09	86.83	86.89	86.84	86.84	86.65	87.08	87.09	84.44	84.43	83.03	83.08	83.07	95.28	84.25	83.26	87	84.66
D16R14	97.57	99	100	98.24	99.11	99.12	99.97	99.99	100	99.07	99.13	---	99.96	99.95	87.07	87.07	87.17	86.88	86.91	86.8	86.8	86.67	87.11	87.14	84.43	84.43	83.35	83.12	83.1	95.24	84.3	83.61	87.05	84.74
D16R19	97.61	99.02	99.93	98.42	99.2	99.19	99.94	99.92	99.93	99.18	99.2	99.93	---	99.97	87.11	87.1	87.19	86.91	86.93	86.85	86.85	86.68	87.11	87.16	84.44	84.44	83.33	83.19	83.14	95.3	84.34	83.57	87.06	84.73
D16R20	97.57	99.1	99.99	98.34	99.2	99.15	99.96	99.81	99.83	99.19	99.23	99.94	99.96	---	87.06	87.06	87.17	86.84	86.88	86.71	86.71	86.6	87.07	87.04	84.4	84.4	83.33	83.13	83.11	95.29	84.11	83.57	87	84.74
96-892	87.19	87.17	87.19	86.99	87.11	87.17	87.19	87.21	87.2	87.15	87.12	87.18	87.19	87.19	---	100	98.98	94.11	94.1	93.84	93.85	91.53	91.56	91.88	85.13	85.13	83.3	83.32	83.32	87.26	85.12	83.72	92.09	84.84
D16Q13	87.2	87.17	87.18	86.98	87.11	87.16	87.19	87.18	87.17	87.14	87.12	87.17	87.19	87.19	100	---	98.96	94.12	94.11	93.87	93.88	91.54	91.57	91.88	85.12	85.12	83.32	83.33	83.3	87.25	85.13	83.73	92.09	84.85
D16Q16	87.25	87.21	87.22	87.03	87.19	87.21	87.26	87.23	87.22	87.18	87.19	87.22	87.24	87.26	98.95	98.95	---	93.99	93.95	93.81	93.8	91.52	91.57	91.84	84.99	84.99	83.27	83.31	83.25	87.3	85.1	83.46	92.01	84.83
D16Q14	87.01	86.95	86.93	86.85	86.98	87.02	87.01	86.99	86.97	87.04	87.01	86.98	87.01	86.98	94.11	94.12	94.06	---	99.61	98.91	98.92	92.51	91.71	91.92	85.08	85.11	83.22	83.22	83.31	87.05	85.09	83.38	92.72	84.81
D16Q20	87.07	87.14	87.1	86.98	87.16	87.1	87.12	87.15	87.12	87.21	87.17	87.12	87.13	87.11	94.29	94.28	94.15	99.73	---	99.14	99.15	92.61	91.86	92.08	85.31	85.34	83.32	83.32	83.32	87.22	85.14	83.56	92.89	84.95
D16R24	86.8	86.87	86.81	86.75	86.9	86.9	86.8	86.86	86.84	86.97	86.94	86.84	86.84	86.8	93.77	93.77	93.69	98.81	98.89	---	99.99	92.35	91.97	92.47	85.39	85.42	83.15	83.29	83.21	86.96	85.31	83.29	92.63	84.73
D17A2	86.83	86.88	86.8	86.77	86.9	86.93	86.79	86.85	86.84	86.96	86.93	86.86	86.86	86.8	93.75	93.74	93.7	98.79	98.9	100	---	92.3	92	92.5	85.39	85.42	83.14	83.26	83.23	86.96	85.31	83.32	92.65	84.71
D16Q15	86.98	86.9	86.95	87.01	86.94	86.96	86.94	86.96	86.93	86.98	86.95	86.94	86.94	86.95	91.76	91.77	91.77	92.75	92.71	92.68	92.69	---	92.69	92.86	85.06	85.08	83.28	83.37	83.36	87.07	84.96	83.62	96.52	84.84
D16R12	87.05	87.09	87.1	86.9	87.1	87.09	87.1	87.1	87.1	87.11	87.11	87.1	87.1	87.11	91.46	91.46	91.43	91.54	91.52	91.9	91.9	92.29	---	95	85.09	85.09	83.23	83.3	83.22	87.16	84.99	83.55	92.49	84.82
D16R18	87.18	87.18	87.18	86.98	87.18	87.18	87.19	87.19	87.18	87.2	87.19	87.19	87.18	87.17	91.86	91.85	91.81	91.84	91.85	92.42	92.42	92.54	95.04	---	84.99	84.99	83.25	83.3	83.19	87.24	84.92	83.55	92.78	84.83
D16Q19	84.34	84.39	84.33	84.27	84.4	84.37	84.34	84.32	84.33	84.39	84.41	84.33	84.33	84.35	85	85	84.95	84.98	85.04	85.29	85.28	84.7	85.04	84.88	---	99.99	85.52	85.65	85.57	84.41	96.59	86.02	84.97	85.23
D16R27	84.38	84.4	84.33	84.28	84.41	84.37	84.33	84.32	84.33	84.4	84.42	84.33	84.33	84.36	84.99	84.99	84.94	85	85.06	85.33	85.32	84.75	85.04	84.92	99.99	---	85.58	85.69	85.65	84.46	96.59	86.1	84.99	85.27
ATCC 19977T	83.13	83.15	83.4	83.03	83.11	83.12	83.39	83.38	83.39	83.14	83.14	83.4	83.39	83.39	83.23	83.23	83.19	83.11	83.14	83.07	83.08	83.06	83.24	83.25	85.59	85.6	---	96.87	97.14	83.23	85.57	86.11	83.24	84.32
CCUG 48898T	83.18	83.18	83.22	83.11	83.17	83.21	83.21	83.25	83.22	83.22	83.19	83.22	83.22	83.22	83.31	83.31	83.29	83.18	83.19	83.23	83.23	83.13	83.38	83.34	85.78	85.78	97	---	97.03	83.28	85.64	86.05	83.29	84.47
CCUG 50184T	83.11	83.09	83.13	82.99	83.02	83.16	83.14	83.13	83.13	83.04	83.04	83.13	83.14	83.13	83.26	83.25	83.25	83.28	83.21	83.22	83.22	83.13	83.25	83.18	85.69	85.69	97.17	96.95	---	83.11	85.64	85.95	83.3	84.31
ATCC 35752T	95.28	95.4	95.41	95.07	95.41	95.47	95.41	95.41	95.41	95.41	95.44	95.42	95.4	95.45	87.3	87.28	87.34	87.05	87.09	87.02	87.02	86.87	87.25	87.27	84.65	84.65	83.27	83.23	83.23	---	84.53	83.41	87.14	84.89
DSM 45524T	84.28	84.23	84.08	84.15	84.23	84.34	84.11	84.2	84.19	84.24	84.22	84.21	84.25	84.13	84.98	84.97	85	84.96	84.85	85.23	85.24	84.66	85.01	84.89	96.52	96.53	85.48	85.5	85.55	84.34	---	86.13	84.87	85.05
ATCC 700505T	83.29	83.29	83.42	83.21	83.24	83.29	83.48	83.41	83.41	83.09	83.25	83.43	83.49	83.54	83.54	83.54	83.28	83.19	83.3	83.18	83.19	83.21	83.47	83.43	85.85	85.87	85.97	85.83	85.77	83.19	85.96	---	83.43	84.23
ATCC 13758T	87.19	87.16	87.16	87	87.16	87.15	87.16	87.17	87.16	87.19	87.17	87.16	87.16	87.17	92.16	92.16	92.05	92.75	92.76	92.71	92.71	96.24	92.7	92.93	85.11	85.11	83.35	83.37	83.34	87.19	85.01	83.68	---	84.9
CCUG 66554T	84.89	84.85	84.89	84.8	84.85	84.86	84.87	84.89	84.87	84.92	84.88	84.88	84.88	84.89	84.91	84.9	84.93	84.86	84.88	84.83	84.83	84.68	85	84.89	85.42	85.41	84.45	84.57	84.43	84.97	85.26	84.41	84.91	---
ANIm	96-1705	96-1717	D16Q24	96-1720	96-1724	96-1728	D16R2	D16R3	D16R7	D16R9	D16R10	D16R14	D16R19	D16R20	96-892	D16Q13	D16Q16	D16Q14	D16Q20	D16R24	D17A2	D16Q15	D16R12	D16R18	D16Q19	D16R27	ATCC 19977T	CCUG 48898T	CCUG 50184T	ATCC 35752T	DSM 45524T	ATCC 700505T	ATCC 13758T	CCUG 66554T
96-1705	---	97.95	98.01	97.95	97.91	97.96	98.01	98.01	98.01	97.92	97.94	98.02	98.01	98.01	87.88	87.88	87.98	87.83	87.84	87.81	87.8	87.71	87.8	87.81	86.14	86.14	85.21	85.24	85.18	95.61	86.08	85.45	87.78	86.31
96-1717	97.95	---	99.23	99.1	99.32	99.29	99.24	99.23	99.23	99.34	99.34	99.23	99.18	99.27	87.83	87.83	87.94	87.76	87.77	87.75	87.74	87.68	87.76	87.76	86.07	86.08	85.19	85.21	85.2	95.59	86.03	85.43	87.75	86.22
D16Q24	98.01	99.23	---	99.07	99.29	99.28	99.97	99.96	99.96	99.33	99.36	99.98	99.98	99.98	87.83	87.83	87.93	87.76	87.78	87.77	87.76	87.69	87.76	87.74	86.06	86.06	85.33	85.21	85.18	95.64	86.02	85.74	87.75	86.23
96-1720	97.95	99.1	99.07	---	99.09	99.06	99.08	99.07	99.07	99.08	99.08	99.08	99.09	99.08	87.89	87.89	87.97	87.84	87.86	87.86	87.86	87.69	87.82	87.78	86.05	86.05	85.21	85.22	85.19	95.64	86	85.45	87.78	86.24
96-1724	97.91	99.31	99.3	99.09	---	99.36	99.3	99.3	99.3	99.89	99.93	99.3	99.31	99.38	87.78	87.78	87.91	87.75	87.76	87.75	87.74	87.67	87.74	87.78	86.07	86.07	85.18	85.21	85.17	95.6	86	85.42	87.72	86.21
96-1728	97.97	99.3	99.3	99.07	99.36	---	99.29	99.29	99.29	99.36	99.35	99.3	99.3	99.3	87.84	87.84	87.94	87.78	87.78	87.77	87.76	87.69	87.75	87.72	86.06	86.07	85.16	85.21	85.22	95.62	86.03	85.47	87.75	86.24
D16R2	98	99.22	99.96	99.06	99.29	99.27	---	99.96	99.96	99.33	99.36	99.97	99.97	99.97	87.82	87.82	87.93	87.76	87.77	87.75	87.75	87.68	87.76	87.73	86.05	86.05	85.32	85.2	85.17	95.63	86	85.7	87.74	86.22
D16R3	98	99.23	99.96	99.07	99.3	99.28	99.97	---	99.98	99.34	99.37	99.98	99.98	99.96	87.82	87.82	87.92	87.76	87.77	87.75	87.75	87.69	87.75	87.73	86.03	86.05	85.33	85.19	85.17	95.63	86.01	85.64	87.73	86.22
D16R7	98	99.22	99.95	99.06	99.29	99.27	99.97	99.97	---	99.33	99.36	99.97	99.97	99.95	87.82	87.82	87.92	87.76	87.77	87.75	87.75	87.68	87.76	87.74	86.05	86.05	85.34	85.2	85.18	95.63	86.01	85.73	87.74	86.23
D16R9	97.93	99.35	99.34	99.09	99.9	99.36	99.35	99.35	99.35	---	99.96	99.35	99.36	99.38	87.8	87.8	87.91	87.77	87.77	87.77	87.76	87.68	87.74	87.77	86.07	86.07	85.18	85.24	85.18	95.61	86.02	85.42	87.72	86.21
D16R10	97.94	99.33	99.36	99.08	99.91	99.33	99.36	99.36	99.36	99.94	---	99.37	99.37	99.36	87.78	87.78	87.91	87.78	87.78	87.78	87.76	87.68	87.74	87.78	86.07	86.07	85.18	85.22	85.18	95.61	86	85.43	87.73	86.22
D16R14	98	99.21	99.96	99.06	99.28	99.26	99.96	99.96	99.96	99.32	99.35	---	99.96	99.96	87.83	87.83	87.93	87.76	87.77	87.75	87.75	87.69	87.76	87.73	86.05	86.05	85.34	85.2	85.18	95.63	86.01	85.65	87.75	86.23
D16R19	98.01	99.18	99.99	99.09	99.3	99.29	99.98	99.98	99.98	99.36	99.38	99.98	---	99.99	87.81	87.81	87.93	87.76	87.77	87.75	87.75	87.68	87.75	87.74	86.03	86.05	85.33	85.2	85.17	95.63	86.01	85.62	87.74	86.23
D16R20	98	99.26	99.97	99.07	99.37	99.29	99.98	99.96	99.96	99.37	99.36	99.98	99.98	---	87.83	87.83	87.94	87.77	87.8	87.77	87.77	87.7	87.76	87.74	86.06	86.06	85.33	85.21	85.19	95.63	86.01	85.64	87.74	86.23
96-892	87.9	87.85	87.84	87.9	87.8	87.85	87.82	87.83	87.83	87.81	87.81	87.83	87.82	87.84	---	99.97	99.12	94.5	94.52	94.22	94.22	92.22	91.9	92.03	86.42	86.42	85.17	85.19	85.17	87.9	86.44	85.51	92.41	86.09
D16Q13	87.9	87.85	87.84	87.9	87.8	87.85	87.82	87.83	87.83	87.8	87.8	87.83	87.82	87.84	99.96	---	99.12	94.51	94.52	94.23	94.23	92.22	91.91	92.04	86.4	86.4	85.16	85.19	85.17	87.9	86.43	85.52	92.41	86.09
D16Q16	88	87.95	87.94	87.98	87.92	87.95	87.94	87.93	87.94	87.92	87.92	87.94	87.94	87.96	99.1	99.1	---	94.46	94.46	94.18	94.18	92.17	91.87	92.02	86.34	86.34	85.15	85.16	85.15	87.97	86.51	85.39	92.36	86.11
D16Q14	87.83	87.77	87.77	87.85	87.77	87.8	87.77	87.77	87.77	87.78	87.78	87.78	87.78	87.78	94.49	94.49	94.47	---	99.71	98.96	98.97	93.14	92.11	92.22	86.51	86.53	85.09	85.21	85.18	87.85	86.51	85.42	93.14	86.1
D16Q20	87.85	87.78	87.81	87.87	87.78	87.8	87.78	87.78	87.78	87.78	87.78	87.78	87.78	87.82	94.52	94.52	94.48	99.73	---	99.15	99.15	93.17	92.15	92.26	86.55	86.57	85.12	85.2	85.13	87.86	86.37	85.43	93.15	86.14
D16R24	87.82	87.77	87.78	87.88	87.78	87.78	87.77	87.77	87.77	87.78	87.78	87.77	87.77	87.78	94.23	94.23	94.21	99	99.15	---	99.96	93.11	92.5	92.86	86.8	86.82	85.11	85.22	85.16	87.85	86.74	85.41	93.09	86.11
D17A2	87.82	87.76	87.78	87.87	87.76	87.78	87.76	87.76	87.76	87.78	87.78	87.77	87.77	87.78	94.22	94.23	94.2	99	99.15	99.95	---	93.11	92.5	92.85	86.78	86.8	85.11	85.21	85.16	87.85	86.73	85.4	93.1	86.1
D16Q15	87.73	87.7	87.71	87.71	87.69	87.71	87.7	87.7	87.7	87.7	87.7	87.71	87.7	87.72	92.22	92.22	92.18	93.17	93.19	93.12	93.12	---	93.09	93.19	86.36	86.39	85.08	85.11	85.07	87.8	86.31	85.36	96.66	86.07
D16R12	87.82	87.77	87.77	87.83	87.75	87.76	87.77	87.76	87.76	87.75	87.75	87.77	87.77	87.77	91.89	91.89	91.86	92.12	92.15	92.5	92.5	93.07	---	95.31	86.3	86.3	85.18	85.16	85.19	87.86	86.3	85.42	93	86.1
D16R18	87.83	87.77	87.75	87.8	87.78	87.73	87.74	87.74	87.74	87.78	87.8	87.75	87.74	87.75	92.03	92.04	92.03	92.24	92.26	92.85	92.85	93.19	95.31	---	86.36	86.36	85.11	85.17	85.16	87.88	86.31	85.42	93.15	86.1
D16Q19	86.18	86.1	86.08	86.08	86.09	86.1	86.07	86.07	86.07	86.1	86.1	86.07	86.07	86.08	86.42	86.42	86.36	86.52	86.56	86.8	86.78	86.37	86.3	86.37	---	99.96	86.75	86.75	86.75	86.09	96.73	87.13	86.44	86.57
D16R27	86.18	86.1	86.08	86.08	86.1	86.1	86.07	86.07	86.07	86.1	86.11	86.08	86.07	86.09	86.41	86.41	86.35	86.53	86.58	86.82	86.8	86.39	86.31	86.37	99.93	---	86.74	86.75	86.73	86.1	96.72	87.14	86.44	86.57
ATCC 19977T	85.23	85.21	85.35	85.23	85.2	85.19	85.35	85.35	85.35	85.2	85.21	85.36	85.35	85.35	85.17	85.17	85.16	85.1	85.13	85.12	85.12	85.08	85.19	85.11	86.74	86.74	---	97.16	97.36	85.25	86.77	87.26	85.15	86.05
CCUG 48898T	85.27	85.23	85.22	85.24	85.24	85.23	85.22	85.22	85.23	85.25	85.25	85.23	85.22	85.22	85.2	85.19	85.17	85.21	85.21	85.22	85.21	85.1	85.17	85.17	86.75	86.75	97.18	---	97.18	85.26	86.76	87.15	85.11	86.09
CCUG 50184T	85.19	85.22	85.2	85.2	85.19	85.25	85.19	85.2	85.2	85.2	85.2	85.2	85.2	85.2	85.18	85.18	85.16	85.18	85.13	85.16	85.16	85.06	85.2	85.15	86.76	86.75	97.36	97.17	---	85.21	86.75	87.15	85.1	86.02
ATCC 35752T	95.59	95.58	95.62	95.62	95.59	95.6	95.62	95.61	95.61	95.6	95.6	95.62	95.62	95.62	87.89	87.89	87.96	87.83	87.84	87.83	87.83	87.78	87.84	87.86	86.07	86.08	85.23	85.25	85.19	---	86.06	85.45	87.78	86.22
DSM 45524T	86.12	86.06	86.05	86.03	86.03	86.07	86.03	86.03	86.03	86.05	86.03	86.03	86.03	86.03	86.45	86.45	86.53	86.52	86.39	86.75	86.75	86.32	86.31	86.31	96.72	96.73	86.78	86.77	86.74	86.09	---	87.28	86.37	86.53
ATCC 700505T	85.46	85.44	85.75	85.46	85.43	85.47	85.71	85.74	85.74	85.42	85.44	85.75	85.71	85.73	85.51	85.52	85.39	85.41	85.42	85.39	85.39	85.34	85.41	85.41	87.12	87.14	87.25	87.13	87.12	85.45	87.25	---	85.34	86.06
ATCC 13758T	87.8	87.76	87.76	87.78	87.73	87.76	87.75	87.75	87.75	87.73	87.74	87.76	87.75	87.75	92.4	92.4	92.37	93.15	93.16	93.09	93.09	96.65	93.01	93.15	86.43	86.43	85.14	85.11	85.1	87.8	86.36	85.35	---	86.13
CCUG 66554T	86.31	86.22	86.24	86.23	86.22	86.24	86.23	86.23	86.24	86.22	86.23	86.24	86.24	86.24	86.09	86.09	86.11	86.1	86.14	86.1	86.09	86.06	86.09	86.09	86.55	86.53	86.03	86.08	85.99	86.23	86.51	86.05	86.12	---
